# Supplementary material
Source: HighWire-hosted journal article supplement (https://emj.bmj.com/content/36/5/287)

## Appendix A: NEWS score card

| National Early Warning Score (NEWS) |       |          |             |             |             |           |            |
|-------------------------------------|-------|----------|-------------|-------------|-------------|-----------|------------|
| PHYSIOLOGICAL PARAMETERS            | 3     | 2        | 1           | 0           | 1           | 2         | 3          |
| Respiration Rate                    | ≤8    |          | 9 - 11      | 12 - 20     |             | 21 - 24   | ≥25        |
| Oxygen Saturations                  | ≤91   | 92 - 93  | 94 - 95     | ≥96         |             |           |            |
| Any Supplemental Oxygen             |       | Yes      |             | No          |             |           |            |
| Temperature                         | ≤35.0 |          | 35.1 - 36.0 | 36.1 - 38.0 | 38.1 - 39.0 | ≥39.1     |            |
| Systolic BP                         | ≤90   | 91 - 100 | 101 - 110   | 111 - 219   |             |           | ≥220       |
| Heart Rate                          | ≤40   |          | 41 - 50     | 51 - 90     | 91 - 110    | 111 - 130 | ≥131       |
| Level of Consciousness              |       |          |             | A           |             |           | V, P, or U |



West of England  
Academic Health  
Science Network



Royal College  
of Physicians

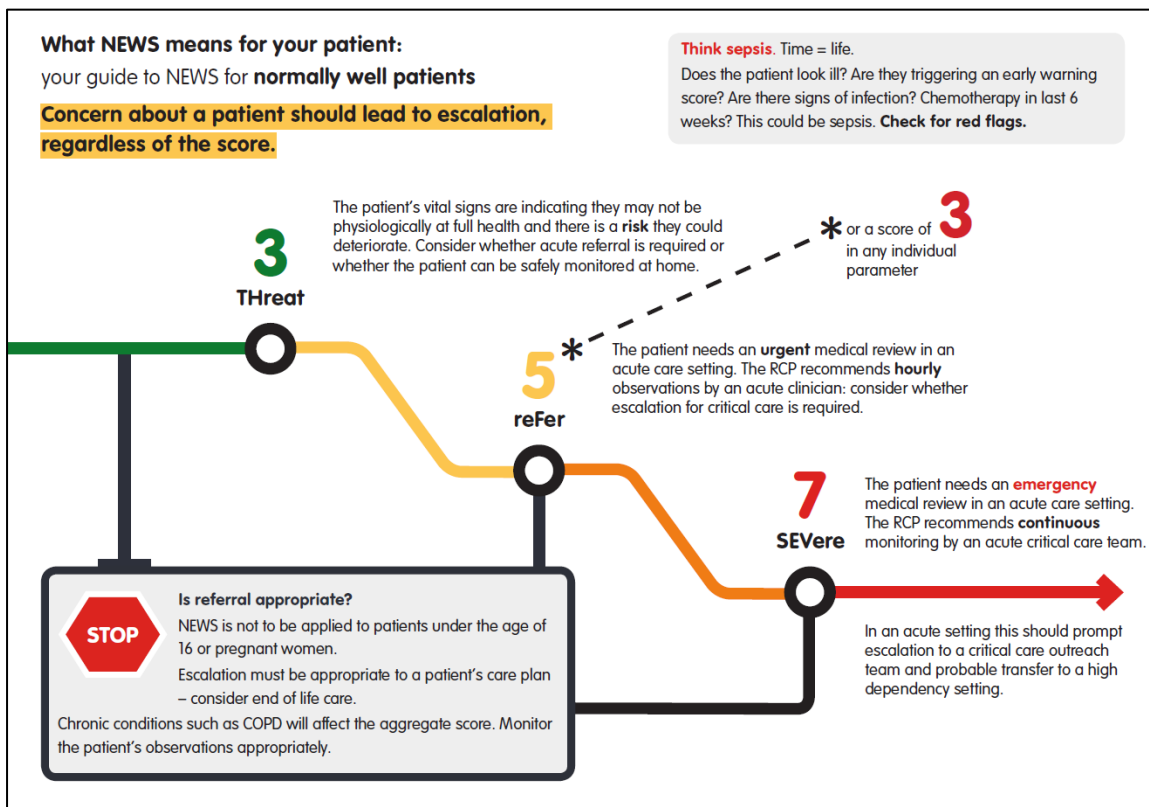

Supplement: inline-supplementary-material-1 [file inline-supplementary-material-1.pdf]
